# Supplementary material for: Anemia and its association with coffee consumption and hookworm infection among pregnant women attending antenatal care at Debre Markos Referral Hospital, Northwest Ethiopia
Source: PLOS journal article supplement (doi:10.1371/journal.pone.0206880), 2018-11-08
Supplement: S1 (10.1371/journal.pone.0206880.s001) [file journal.pone.0206880.s001]

### **Annex 3: Consent form English Version**

My name is \_\_\_\_\_. I am here to collect information from you about factors associated with Anemia.

I am going to ask you some questions and take blood and stool sample. Your honestly participation in filling questionnaires and giving the required amount of sample will provide us a valid result. Your participation in every aspect of the study is completely voluntary. You may skip any question that you prefer not to answer, but we would appreciate your cooperation. You may also ask me to clarify questions if you don't understand them or can stop the interview at any time. Finally, all the information that you provide for the study is kept completely confidential. Your responses to our questions are identified only by number, never by name. There is no side effects and known health risks related with this research other than a slight discomfort especially during giving blood and it takes only 15 minutes of participation.

Thank you for your participation and listening

Are you willing to participate?

1. Yes                                      2. No (stop the interview)

Participants Signature \_\_\_\_\_ Date \_\_\_\_/\_\_\_\_/\_\_\_\_

Data collector Name \_\_\_\_\_ Signature \_\_\_\_\_ Date \_\_\_\_/\_\_\_\_/\_\_\_\_

Supervisor Name \_\_\_\_\_ Signature \_\_\_\_\_ Date \_\_\_\_/\_\_\_\_/\_\_\_\_

## Annex 4: Questionnaires

This questionnaire is prepared to collect socio demographic, reproductive and dietary pattern data from pregnant women for the study which aims to assess prevalence and factors associated with anemia among pregnant women in Debre Markos.

**Code number:** \_\_\_\_\_

**Chart number:** \_\_\_\_\_

### Part 1: Socio-demographic assessment

| S. N | Questions                               | Response categories                                                                                | Remarks |
|------|-----------------------------------------|----------------------------------------------------------------------------------------------------|---------|
| 101  | How old are you?                        | _____ year                                                                                         |         |
| 102  | What is your religion?                  | 1. Orthodox<br>2. Muslim<br>3. Protestant<br>4. Catholic<br>5. Adventist<br>6. Others specify_____ |         |
| 103  | What is your ethnicity                  | 1. Amhara<br>2. Tigire<br>3. Oromo<br>4. Other specify_____                                        |         |
| 104  | What is your current marital status?    | 1. Single<br>2. Married<br>3. Divorced<br>4. Widowed<br>5. Separated                               |         |
| 105  | How many people live in your household? | _____                                                                                              |         |
| 106  | What is your educational Status?        | 1. Unable to read and write<br>2. Able to read and write                                           |         |

|     |                              |                                                                                                                     |  |
|-----|------------------------------|---------------------------------------------------------------------------------------------------------------------|--|
|     |                              | 3. Grade 1-4<br>4. Grade 5-8<br>5. Grade 9-10<br>6. Grade 11-12<br>7. Certificate and above                         |  |
| 107 | What is your occupation?     | 1. House wife<br>2. Farmer<br>3. Merchant<br>4. Governmental employee<br>5. Daily labourer<br>6. Other specify_____ |  |
| 108 | What is your monthly income? | _____ ETB                                                                                                           |  |

## Part 2: Environmental and Sanitation Factors

| S. N | Questions                                                 | Response categories                                                                                                             | Remarks |
|------|-----------------------------------------------------------|---------------------------------------------------------------------------------------------------------------------------------|---------|
| 201  | What is the main source of drinking water to your family? | 1. Tap<br>2. Protected wells<br>3. Un protected wells<br>4. Protected Spring<br>5. Un protected Spring<br>4. other specify_____ |         |
| 202  | Do you have latrine?                                      | 1. Yes 2. No                                                                                                                    |         |

|     |                                                                           |                                                                                                                   |  |
|-----|---------------------------------------------------------------------------|-------------------------------------------------------------------------------------------------------------------|--|
| 203 | If yes to Q 202 what type of latrine facilities do you use in your house? | 1. Pit latrine with cover<br>2. Pit latrine without cover<br>4. water flush<br>5. Public<br>6. other specify_____ |  |
|-----|---------------------------------------------------------------------------|-------------------------------------------------------------------------------------------------------------------|--|

### Part 3: Clinical Assessment (from study participant and medical chart)

| S. N | Questions                                                                               | Response categories | Remarks |
|------|-----------------------------------------------------------------------------------------|---------------------|---------|
| 301  | Have you ever received iron supplement from a health professional or a health facility? | 1. yes<br>2. No     |         |
| 302  | If yes to Q 302 how long did you take iron supplement?                                  | _____               |         |
| 303  | Have you ever had diarrhoea within last two weeks?                                      | 1. yes<br>2. No     |         |
| 304  | Have you ever had a blood loss within the past three months?                            | 1. yes<br>2. No     |         |
| 305  | Have you ever had surgical intervention within the past one month?                      | 1. yes<br>2. No     |         |
| 306  | Do you have a history of diabetes mellitus?                                             | 1. yes<br>2. No     |         |
| 307  | Do you have a history of cancer?                                                        | 1. yes<br>2. No     |         |
| 308  | Do you have known chronic organ problem?                                                | 1.yes<br>2. No      |         |

|     |                              |                                                            |  |
|-----|------------------------------|------------------------------------------------------------|--|
| 309 | If yes to Q 411 which organ? | 1. Liver<br>2. Kidney<br>3. Heart<br>4. Other specify_____ |  |
|-----|------------------------------|------------------------------------------------------------|--|

#### Part 4: Reproductive Assessment

| S. N | Questions                                                   | Response categories      | Remarks |
|------|-------------------------------------------------------------|--------------------------|---------|
| 401  | Do you have live births?                                    | 1. Yes 2. No             |         |
| 402  | How many live births do you have ever?                      | _____                    |         |
| 403  | Have you ever had still birth?                              | 1. Yes 2. No             |         |
| 404  | If yes to Q 502, how many?                                  | _____                    |         |
| 405  | Have you ever had abortion?                                 | 1. Yes 2. No             |         |
| 406  | If yes to Q 504, how many?                                  | _____                    |         |
| 407  | How long after the first birth did you get the second birth | _____                    |         |
| 408  | What is your gestational age?                               | _____ weeks.             |         |
| 409  | Menstrual character                                         | 1.Regular<br>2.Irrigular |         |

#### Part 5: Nutrition related factors Assessment

| S. N | Questions                                              | Response categories                                        | Remarks |
|------|--------------------------------------------------------|------------------------------------------------------------|---------|
| 501  | What is the main staple diet do you use in your house? | 1. Maize<br>2. Teff<br>3. Sorghum<br>3. Millet<br>4. Wheat |         |

|     |                                                              |                                                                                   |  |
|-----|--------------------------------------------------------------|-----------------------------------------------------------------------------------|--|
|     |                                                              | 6. Other (specify)_____                                                           |  |
| 502 | How many times a day do you eat?                             | _____                                                                             |  |
| 503 | How does your family meet its food needs?                    | 1. Grow their own<br>2. Buy/purchase<br>3. Subsidies/food aid<br>4. Others: _____ |  |
| 504 | Have you ever received nutrition education during pregnancy? | 1. yes<br>2. No                                                                   |  |

### Part 6: Behavioral Factors

| S. N | Questions                                                        | Response categories                                                                           | Remarks |
|------|------------------------------------------------------------------|-----------------------------------------------------------------------------------------------|---------|
| 601  | Do you drink coffee?                                             | 1. Yes<br>2. No                                                                               |         |
| 602  | If yes to Q 801 how many cups do you drink per day?              | _____ cups per day.                                                                           |         |
| 603  | Do you drink alcohol or beverages?                               | 1. Yes    2. No                                                                               |         |
| 604  | If yes to Q 803 which type of alcohol or beverages?              | 1. Beer        2. wine<br>3. Tela        4. Teji<br>5. Local areki<br>6. Other (specify)_____ |         |
| 605  | Is there a person who smoke in your house hold or working place? | 1. Yes<br>2. No                                                                               |         |
| 606  | Do you smoke?                                                    | 1. Yes    2. No                                                                               |         |
| 607  | If yes to Q 807 how many times you smoke per day?                | _____                                                                                         |         |

## Part 7: Dietary Diversity Assessment

Please describe the foods (meals and snacks) that the respondent ate yesterday during the day and night, whether at home or outside the home.

| Breakfast | Snack | Lunch | Snack | Dinner | Snack |
|-----------|-------|-------|-------|--------|-------|
|           |       |       |       |        |       |

When the respondent recall is complete, fill in the food groups based on the information recorded above. For any food groups not mentioned, ask the respondent if a food item from this group was consumed.

| S. No | Food group                  | Examples                                                                | Yes=1<br>No=2 |
|-------|-----------------------------|-------------------------------------------------------------------------|---------------|
| 701   | Starchy staple              | corn/maize, rice, wheat, sorghum, teff, millet, bread, enjera, porridge |               |
| 702   | Dark green leafy vegetables | Spinach, kale, cassava                                                  |               |

|     |                                      |                                                                                                                     |  |
|-----|--------------------------------------|---------------------------------------------------------------------------------------------------------------------|--|
| 703 | Vitamin A rich fruits and vegetables | pumpkin, carrots, or sweet potatoes that are orange or dark yellow inside, <i>red sweet pepper, mango, papaya</i>   |  |
| 704 | Other fruits and vegetables          | Vegetables like tomato, onion, garlic, cabbage, lettuce, and fruits like apple, avocado, banana, lemon, grapes      |  |
| 705 | Organ meat                           | liver, kidney, heart or other organ meats or blood-based foods                                                      |  |
| 706 | Flesh meat and fish                  | beef, pork, goat, chicken, or other birds, fish                                                                     |  |
| 707 | Eggs                                 | chicken or other bird egg                                                                                           |  |
| 708 | Legumes/ nuts                        | beans, peas, lentils, nuts, seeds or foods made from these                                                          |  |
| 709 | Milk and milk products               | milk, cheese, yogurt or other milk products                                                                         |  |
| 710 | oils and fats                        | oil, fats or butter added to food or used for cooking                                                               |  |
| 711 | Sweets                               | sugar, honey, sweetened soda or sweetened juice drinks, sugary foods such as chocolates, candies, cookies and cakes |  |
| 712 | Spices, condiments, beverages        | spices (black pepper, salt), condiments (soy sauce, hot sauce), tea, hard spirits                                   |  |

### **Anthropometry**

MUAC \_\_\_\_\_

### **Laboratory Findings**

Intestinal parasite \_\_\_\_\_

Hemoglobin \_\_\_\_\_



የጥናቱን አላማ በመረዳት እና በፍቃደኝነት ላይ የተመሰረተ የስምምነት ውል

ስሜ \_\_\_\_\_ ይባላል። እኔ \_\_\_\_\_

ጥያቄ ካለዎት ይጠይቁኝ \_\_\_\_\_

## ለመሳተፍ ፈቃደኛ ነዎት?

ከዎ \_\_\_\_\_ ቃለ መጠይቅ ይቀጥላል

አይደለም \_\_\_\_\_ ጥያቄውን በማቆም አመስግንን እንዲሰናበቱ እናደርጋለን።

Ф? / /

የተሰታፊው ፊርማ / ዳካ/.....

**የጠያቂው ስምና**

မလေး

**የተቆጣጣሪው ስምና**

**မင်္ဂလာ**

## Annex 7. የአማርኛ መጠይቅ: Amharic version of questionnaire

### መጠይቅ:

ይህ መጠይቅ የተዘጋጀው በሰሜን ኢትዮጵያ፣ በጎንደር ከተማ፣ በጎንደር ዩኒቨርሲቲ ሆስፒታል በነፍሰጡር እናቶች ላይ የደም ማነስ መጠንና ተዛማችነት ያላቸውን ምክንያቶችን መረጃ ለመሰብሰብ ነው።

መጠይቅ መለያ ቁጥር \_\_\_\_\_

ካርድ ቁጥር \_\_\_\_\_

### ክፍል 1: አጠቃላይ ማህበራዊና ስነ-ህዝባዊ ሁኔታ

| ተ.ቁ | ጥያቄዎች                 | መልሶች ( አማራጮች)                                                                    | አስተያየት |
|-----|-----------------------|----------------------------------------------------------------------------------|--------|
| 101 | ዕድሜዎት ስንት ነው?         | _____ ዓመት                                                                        |        |
| 102 | ሃይማኖትዎ ምንድን ነው?       | 1. ኦርቶዶክስ<br>2. ሙስሊም<br>3. ፕሮቴስታንት<br>4. ካቶልክ<br>5. አድቪንትስት<br>6. ሌላ (ይገለፅ)..... |        |
| 103 | የየትኛው ብሄረ አባል ነዎት?    | 1. አማራ<br>2. ትግሬ<br>3. ኦሮሞ<br>4. ሌላ (ይገለፅ).....                                  |        |
| 104 | የትዳርዎ ሁኔታ ምንድን ነው?    | 1. ያገባች<br>2. ያላገባች<br>3. የተፋታች<br>4. የሞተባት<br>5. ተለይታ የምትኖር                     |        |
| 105 | የቤተሰብዎ ብዛት ምን ያክል ነው? | .....                                                                            |        |

|     |                                 |                                                                                                                                          |  |
|-----|---------------------------------|------------------------------------------------------------------------------------------------------------------------------------------|--|
| 106 | የትምህርት ደረጃዎ/ክፍልዎ ስንት ነው?        | 1. ማንበብ እና መፃፍ የማትችል<br>2. ማንበብ እና መፃፍ የሚችል<br>3. ከ 1 - 4 ክፍል<br>4. ከ 5 -8 ክፍል<br>5. ከ 9- 10 ክፍል<br>6. ከ 11-12 ክፍል<br>7. ሴርትፍኬትና ከዝያ በላይ |  |
| 107 | የተሰማሩበት የስራ መስክ/ዋና ስራዎ ምንድን ነው? | 1. የቤት እመቤት<br>2. የግብርና ሙያ<br>3. ንግድ<br>4. የመንግስት ተቀጣሪ<br>5. የጉልበት ሰራተኛ<br>6. ሌላ (ይገለፅ) .....                                            |  |
| 108 | የቤት-ሰብዎ የወር ገቢ ምንያክል ነው?        | _____ብር                                                                                                                                  |  |

## ክፍል 2:- የአካባቢ ንጽህና እና ተዛማጅ ሁኔታዎች

|     |                                                   |                                                                                                                       |
|-----|---------------------------------------------------|-----------------------------------------------------------------------------------------------------------------------|
| 201 | የመጠጥ ዉሃ በአብዛኛዉ የምታገኙት ከየት ነዉ?                     | 1. የጋራ ቧንቧ/ቦኖ<br>2. የግል ቧንቧ<br>3. የተጠበቀ ጉድጉድ<br>4. ያልተጠበቀ ጉድጉድ<br>5. የተጠበቀ ምንጭ<br>6. ያልተጠበቀ ምንጭ<br>7. ሌላ ካለ ይጠቀስ..... |
| 202 | መፀዳጃ ቤት አለዎት?                                     | 1. አወ<br>2. የለም                                                                                                       |
| 203 | ለ ተ. ቁ 202 መልስዎ አዎ ከሆነ ምን አይነት መፀዳጃ ቤት ነዉ የሚጠቀሙት? | 1. ጉድጓድ መጠለያ ያለዉ<br>2. ጉድጓድ መጠለያ የሌለዉ<br>3. በዉሃ የሚሰራ                                                                  |

|  |  |                                   |
|--|--|-----------------------------------|
|  |  | 4. የሀዘብ/የጋራ<br>5. ሌላ ካለ ይጠቀስ..... |
|--|--|-----------------------------------|

**ክፍል 3: የበሽታና ተዛማጅ ሁኔታዎች**

| ተ.ቁ | ጥያቄዎች                                | መልሶች (አማራጮች)                                       |
|-----|--------------------------------------|----------------------------------------------------|
| 301 | የአይረን ክረን ወስደዉ ያዉቃሉ?                 | 1. አዎ                      2. አላዉቅም                |
| 302 | ለ ተ. ቁ 402 መልስዎ አዎ ከሆነ ለምን ያህል ጊዜ?   | .....                                              |
| 303 | በዚህ ሁለት ሳምንት ውስጥ አስቀምጦት ያዉቃል?        | 1. አዎ                      2. አያዉቅም                |
| 304 | በዚህ 3 ወር ውስጥ የደም መፈሰስ አጋጥመዎታል?       | 1. አዎ                      2. አላጋጠመኝ               |
| 305 | በዚህ አንድ ወር ውስጥ ቀዶ ህክምና ተደርጎልዎት ያዉቃል? | 1. አዎ                      2. አያዉቅም                |
| 306 | የስኳር በሽታ አለበዎት?                      | 1. አዎ                      2. የለብኝም                |
| 307 | የካንሰር በሽታ አለበዎት?                     | 1. አዎ                      2. የለብኝም                |
| 308 | ለብዙ ጊዜ የቆየ የዉስጥ አካል ክፍል ህመም አለበዎት?   | 1. አዎ                      2. የለብኝም                |
| 309 | ለ ተ.ቁ 411 መልስዎ አዎ ከሆነ የትኛዉ ነዉ?       | 1. የጉበት<br>2. የኩላሊት<br>3. የልብ<br>4. ሌላ (ይገለፅ)..... |

#### ክፍል 4: የሰነድ ተዋልዶ ዳሰሳ

|     |                                                    |                              |
|-----|----------------------------------------------------|------------------------------|
| 401 | ስንት ልጆች አሉክ?                                       | .....                        |
| 402 | ከ28 ሳምንት የእርግዝና ጊዜ በኋላ የፅንሰ መቋረጥ (ልጅ ጠፍቶብሽ ያወቃል)?  | 1. አዎ<br>2. አያወቅም            |
| 403 | ለ ተ.ቁ 502 መልስዎ አዎ ከሆነ ስንት ጊዜ?                      | .....                        |
| 404 | ከ28 ሳምንት የእርግዝና ጊዜ በ ፊት የፅንሰ መቋረጥ (ልጅ ጠፍቶብሽ ያወቃል)? | 1. አዎ<br>2. አያወቅም            |
| 405 | ለ ተ.ቁ 504 መልስዎ አዎ ከሆነ ስንት ጊዜ?                      | .....                        |
| 406 | በልጆችሽ መካከል ምን ያክል የእድሜ ልዩነት አለ?                    | _____                        |
| 407 | ከፀነሱ (ነፍሱ ጡር ከሆኑ) ምን ያክል ጊዜ ሆነዎት?                  | _____ ሳምንት                   |
| 408 | የወር አበባሽ አመጣጡ እንዴት ነው?                             | 1. ጊዜውን ጠብቆ<br>2. ጊዜውን ሳይጠብቅ |

### ክፍል 5: የስነምግብና ተዛማጅ ዳሰሳ

| ተ.ቁ | ጥያቄዎች                                 | መልሶች (አማራጮች)                                                                                                                                                 |
|-----|---------------------------------------|--------------------------------------------------------------------------------------------------------------------------------------------------------------|
| 501 | በብዛት በቤት ውስጥ የሚጠቀሙት የምግብ አይነት ምንድ ነው? | 1. በቆሎ                                  2. ጤፍ<br>3. ማሽላ                                4. ዳጉሳ<br>5. ስንዴ                                 6. ሌላ<br>(ይገለፅ)_____ |
| 502 | በቀን ምን ያህል ጊዜ ይመገባሉ?                  | _____ጊዜ በቀን                                                                                                                                                  |
| 503 | የምግብ ፊጀታዎን በአብዛኛው የት ነው የሚያገኙት ?      | 1. እራሳቸው በሚያመረቱት<br>2. ከገቢያ በምገዛት<br>3. ከእረዳታ በሚያገኙት<br>4. ሌላ (ይገለፁ)-----                                                                                    |

|     |                                               |                |    |
|-----|-----------------------------------------------|----------------|----|
| 504 | በእርግዝናዎ ጊዜ ስለ አመጋገብዎት ትምህርት (ምክር) አግኝተዉ ያዉቃሉ? | 1. አዎ<br>አላዉቅም | 2. |
|-----|-----------------------------------------------|----------------|----|

### ክፍል 6: የባህሪና ተዛማጅ ሁኔታዎች

|     |                                               |                                              |                          |
|-----|-----------------------------------------------|----------------------------------------------|--------------------------|
| 601 | ቡና ይጠጣሉ?                                      | 1. አወ                                        | 2. አልጠጣም                 |
| 602 | ለተ.ቁ 801 መልስዎ አዎ ከሆነ በቀን ምን ያህል ስኒ ቡና ይጠጣሉ?   | _____ የ ቡና ስኒ                                |                          |
| 603 | የአልኮል መጠጦች ይጠጣሉ?                              | 1. አወ                                        | 2. አልጠጣም                 |
| 604 | ለተ.ቁ 804 መልስዎ አዎ ከሆነ ምን አይነት የአልኮል መጠጦች ይጠጣሉ? | 1. ቢራ<br>3. ጠላ<br>5. የአበሻ አረቂ<br>(ይግለፁ)----- | 2. ወይን<br>4. ጠጅ<br>6. ሌላ |
| 605 | በሚሰሩበት ቦታ ወይም ከቤተሰብዎት አባላት ውስጥ ሰጋራ የሚያጨስ አለ?  | 1. አለ<br>የለም                                 | 2.                       |
| 606 | ሲጋራ ያጫሳሉ                                      | 1. አወ<br>አላጭስም                               | 2.                       |
| 607 | ለ ተ.ቁ 807 መልስዎ አዎ ከሆነ በቀን ሰንት ሲጋራ ያጫሳሉ?       | _____                                        |                          |

### ክፍል 7: የምግብ አመጋገብ ልምድ ዳሰሳ

| በትላንትናዉ ዕለት በቤት ውስጥ እና ከቤት ዉጭ የተመገቧቸዉን የምግብ ዐይነቶች እባክዎ በዝርዝር ይንገሩን |      |    |      |    |      |
|--------------------------------------------------------------------|------|----|------|----|------|
| ቁርስ                                                                | መክሰስ | ምሳ | መክሰስ | ራት | መክሰስ |
|                                                                    |      |    |      |    |      |

መላሾቹ የተመገቡአቸውን ምግቦች አስታውሰው ከተናገሩ በኋላ በመረጃው መሰረት የምግብ አይነቶችን ለይታችሁ አስቀምጡ :: መላሾቹ ተመግበው ነገር ግን ያልተናገሩት የምግብ አይነት ካለ ጠይቃችሁ አስቀምጡ ::

| S. No | የምግብ አይነት                     | በአካባቢው የሚገኙ የምግብ ዝርዝር                                                   | አወ=1<br>የለም=2 |
|-------|-------------------------------|-------------------------------------------------------------------------|---------------|
| 701   | እህል እና የእህል ውጤቶች              | በቆሎ፤ ሩዝ፤ ስንዴ፤ ማሽላ፤ ጤፍ፤ ዳጉሳ፤ ፓስታ፤ እንጀራ፤ ቅንጨ፤ ገንፎ                         |               |
| 702   | ጥራጥሬ                          | ባቂላ፤ አተር፤ ሽምብራ፤ ጓያ፤ ኑግ፤ ምስር                                             |               |
| 703   | አርንጓዴ ቅጠል ያላቸው አትክልቶች         | ሰላጣ፤ ካዛቫ፤ ቆስታ                                                           |               |
| 704   | በቫይታሚን የበለፀጉ አትክልቶች እና ፍራፍሬዎች | ዱባ፤ ካሮት፤ ቃሪያ፤ ስኳር ድንች፤ ድንች፤ ማንጎ፤ ፓፓያ                                    |               |
| 705   | ሌሎች አትክልቶች                    | ቲማቲም፤ ቀይ ሽንኩርት፤ ነጭ ሽንኩርት፤ የአበሻ ጎምን፤ ጥቅል ጎመን፤ አፕል፤ አፕሪኮ፤ ሙዝ፤ ሎሚ፤ የወይን ፍሬ |               |
| 706   | የአካለት ስጋ                      | ጉበት፤ ኩላሊት፤ ልብ እና ደም ነክ ምግቦች                                             |               |
| 707   | ስጋ እና የአሳ ምግቦች                | የከብት፤ በግ፤ ፍይል፤ ደሮ፤ ቆቅ፤ ጎሮጎራ፤ አሳ፤ አምባዛ                                   |               |
| 708   | እንቁላል                         | የደሮ እንቁላል ጥብስ፤ ቅቅል                                                      |               |
| 709   | ወተት እና የወተት ውጤቶች              | ወተት፤ አይብ፤ እርጎ፤ አንት፤ ጠለላ                                                 |               |
| 710   | የዘይት እና የቅባት ምግቦች             | ዘየት፤ ቅቤ የተጨመረባቸው ምግቦች                                                   |               |
| 711   | ጣፋጭ ምግቦች                      | ስኳር፤ ማር፤ ጣፋጭ ጭማቂዎች፤ ቸኮሌት፤ ከረሜላ፤ ኬክ                                      |               |
| 712   | ቅመማቅመሞች እና መጠጦች               | ጨው፤ ሻይ፤ የለስላሳ መጠጦች                                                      |               |

**Anthropometry**

MUAC \_\_\_\_\_

**Laboratory Findings**

Intestinal parasite \_\_\_\_\_

Hemoglobin \_\_\_\_\_
